# Supplementary material for: GFI1 facilitates efficient DNA repair by regulating PRMT1 dependent methylation of MRE11 and 53BP1
Source: PubMed Central journal article supplement (PMC5897347; doi:10.1038/s41467-018-03817-5), 2018-04-12
Supplement: 41467_2018_3817_MOESM3_ESM.pdf [file 41467_2018_3817_MOESM3_ESM.pdf]

## **Description of Additional Supplementary Files**

File Name: Supplementary Data 1

Description: Processed proteomics listing all GFI1 binding partners considered significant.

File Name: Supplementary Data 2

Description: List of sample sizes for all data points for each figure.
